# Supplementary material
Source: PubMed Central journal article supplement (PMC5378630)
Supplement: NIHMS843088-supplement-Supplemental_Digital_Content.pdf [file NIHMS843088-supplement-Supplemental_Digital_Content.pdf]

Supplementary Digital Content for “Measurement error correction for predicted spatiotemporal air pollution exposures.”

**eTable 1.** Parameter estimates for spatiotemporal model of ambient PM<sub>2.5</sub>.

|                                            | Estimate | Standard Error |
|--------------------------------------------|----------|----------------|
| <b>Spatiotemporal Covariates</b>           |          |                |
| Temperature (10° C)                        | 0.037    | 0.037          |
| Wind Speed (10 m/s)                        | -0.249   | 0.060          |
| Relative Humidity (10%)                    | -0.015   | 0.010          |
| <b>Long-term Mean</b>                      |          |                |
| Intercept                                  | 1.744    | 1.117          |
| Percent Forest Cover (%)                   | -0.003   | 0.001          |
| Distance to Emissions Point Source (10 km) | -0.059   | 0.025          |
| Log of Range Parameter (km)                | 4.179    | 0.506          |
| Log of Sill Parameter                      | -4.507   | 0.314          |
| <b>Time Trend Coefficients</b>             |          |                |
| Intercept                                  | 0.073    | 0.044          |
| Elevation (100m)                           | 0.013    | 0.006          |
| Percent Forest Cover (%)                   | 0.001    | <0.001         |
| Local Road Length (10 km)                  | -0.030   | 0.015          |
| Highway Length (10 km)                     | -0.056   | 0.026          |
| Log of Range Parameter (km)                | 5.253    | 0.635          |
| Log of Sill Parameter                      | -5.371   | 0.534          |
| <b>Spatiotemporal Residual</b>             |          |                |
| Log of Range Parameter (km)                | 6.491    | 0.094          |
| Log of Sill Parameter                      | -3.130   | 0.075          |
| Log of Nugget Parameter                    | -4.782   | 0.030          |

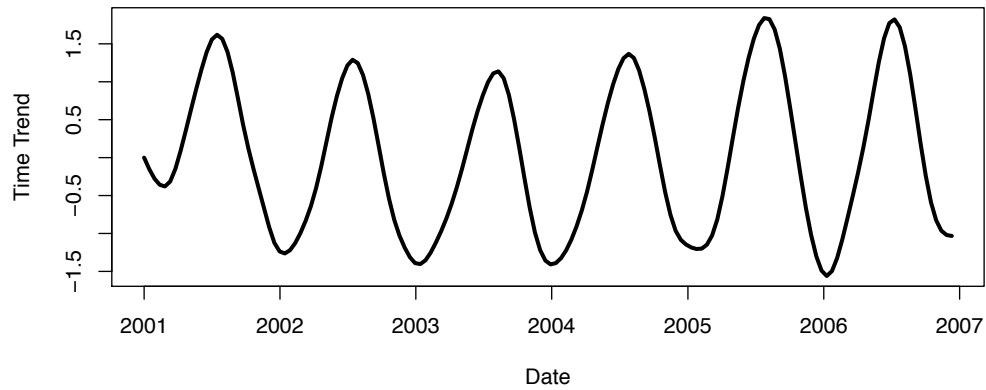

**eFigure 1.** PM<sub>2.5</sub> time trend estimated from monitoring data. Trend is shown on the standardized scale.

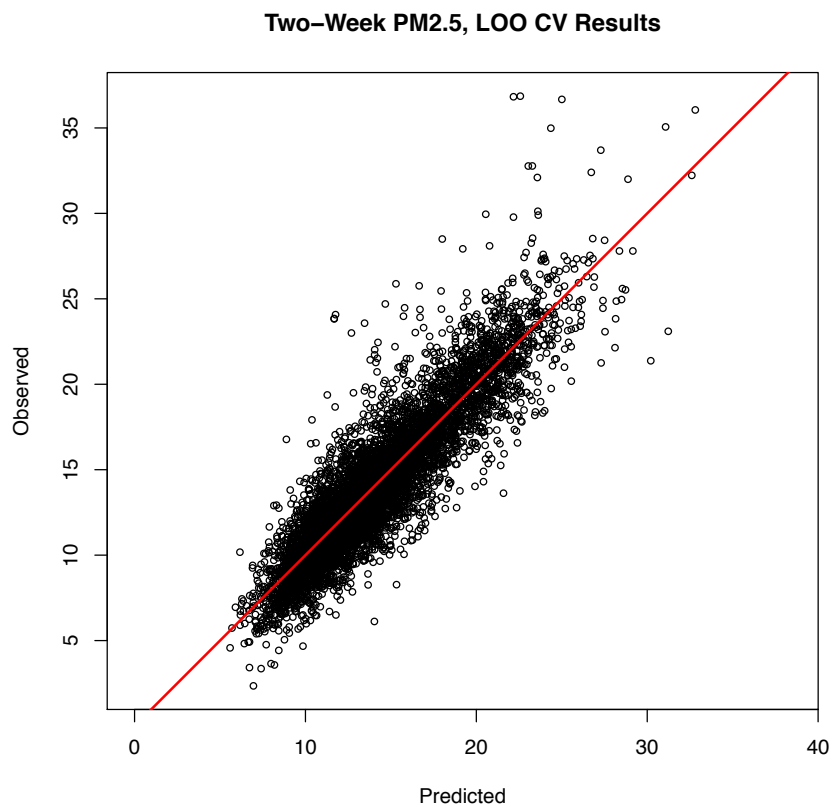

**eFigure 2.** Observations and cross-validated predictions of two-week average PM<sub>2.5</sub> concentrations ( $\mu\text{g}/\text{m}^3$ ) from 2002 through 2006. The 1-1 line is drawn for reference.

**eTable 2.** Estimated difference in birth weight (in grams) associated with 1  $\mu\text{g}/\text{m}^3$  higher ambient average  $\text{PM}_{2.5}$  during the specified trimester, among births to mothers in all counties. Bootstrap corrections are based upon 1,000 bootstrap samples.

| <b>Cohort</b> | <b>Correction</b> | <b>Trimester</b> | <b>Estimate</b> | <b>Std. Err</b> |
|---------------|-------------------|------------------|-----------------|-----------------|
| Statewide     | Non-Parametric    | 1                | 0.43            | 0.55            |
|               |                   | 2                | -0.65           | 0.56            |
|               |                   | 3                | -0.51           | 0.58            |
|               | Parameter         | 1                | 0.28            | 0.68            |
|               |                   | 2                | -0.63           | 0.67            |
|               |                   | 3                | -0.65           | 0.61            |

**eTable 3.** Estimated difference in birth weight (in grams) associated with 1  $\mu\text{g}/\text{m}^3$  higher ambient average  $\text{PM}_{2.5}$  during the third trimester in the restricted cohort. The degrees of freedom (df) per year in the health model reflects different amount of temporal smoothing.

| <b>df per year</b> | <b>Estimate</b> | <b>Std. Err</b> | <b>95% CI</b>  |
|--------------------|-----------------|-----------------|----------------|
| 1                  | -0.70           | 0.39            | (-1.46, 0.05)  |
| 2                  | -0.75           | 0.69            | (-2.10, 0.59)  |
| 3                  | -1.98           | 0.77            | (-3.50, -0.46) |
| 4                  | -2.36           | 0.78            | (-3.89, -0.83) |
| 5                  | -2.31           | 0.79            | (-3.85, -0.77) |
| 6                  | -2.44           | 0.80            | (-4.00, -0.88) |
| 7                  | -2.38           | 0.80            | (-3.95, -0.80) |
| 8                  | -2.33           | 0.80            | (-3.90, -0.75) |

## eAppendix 1. Example R code for running non-parametric and parameter bootstrap.

```
# Example code for running the non-parametric bootstrap and the
# parameter bootstrap.

# First are three auxiliary functions,
# followed by a description of the R
# objects in the accompanying data file,
# followed then by code for running the
# bootstrap procedures.
# For each bootstrap (non-parametric and
# parameter), the code is in two parts.
# The first part deals with the exposure
# data, the second part with the health
# analysis.

#####
# create_timemx()
#
# Function for creating a list of time-space linkages
#
# INPUT:
#   gridIDs -- vector of grid IDs
#   dates -- optional data frame for supplying the conception, trimester,
#           and birth dates
#   obsdates -- dates for which exposures are available. gestational
#              dates will be matched to the closest date in this vector
#   concep.date -- conception dates
#   T2 -- dates of start of second trimester
#   T3 -- dates of start of third trimester
#   dob -- dates of birth
#
# OUTPUT: A list of length equal to the number of
#         unique grid IDs. Each element in the list is
#         a set of three sparse matrices (one for each
#         trimester). The number of rows is equal to
#         the number of obsdates. The number of columns
#         depends upon how many births occurred in that
#         grid cell. Columns of the matrix sum to 1,
#         with non-zero entries corresponding to the
#         interval of the corresponding trimester.
#         This is designed to allow for easily computing
#         averages in the bootstrap procedure by simple
#         matrix multiplication.
#
create_timemx <- function(gridIDs, dates=NULL, obsdates,
  concep.date=dates$concep.date, T2=dates$T2, T3=dates$T3, dob=dates$dob){
```

```

T1.int <- findInterval(concep.date, obsdates)
T2.int <- findInterval(T2, obsdates)
T3.int <- findInterval(T3, obsdates)
dob.int <- findInterval(dob, obsdates)

newdates <- data.frame(T1.int=T1.int, T2.int=T2.int, T3.int=T3.int,
dob.int=dob.int)
ndates <- length(obsdates)

grid.list = sort(unique(gridIDs))

time.mx <- vector("list", length=length(grid.list))
names(time.mx) <- grid.list

for (i in 1:length(grid.list)) {
  grid.i = grid.list[i]

  ## Extract birth records in grid cell i
  use = which(gridIDs == grid.i)
  dat.i <- newdates[use,]

  ## Calculate exposure indicators
  time.mx[[i]]$T1 <- Matrix(mapply(createExpInd,a = dat.i$T1.int, b =
dat.i$T2.int, n= ndates), sparse=TRUE, dimnames=list(NULL, rownames(dat.i)))
  time.mx[[i]]$T2 <- Matrix(mapply (createExpInd,a = dat.i$T2.int, b =
dat.i$T3.int, n= ndates), sparse=TRUE, dimnames=list(NULL, rownames(dat.i)))
  time.mx[[i]]$T3 <- Matrix(mapply (createExpInd,a = dat.i$T3.int, b =
dat.i$dob.int, n= ndates), sparse=TRUE, dimnames=list(NULL, rownames(dat.i)))
}
return(time.mx)
}

# Helper function for getting the indices
# corresponding to exposure. Creates
# an n-vector, with zeros everywhere
# except from indices a to b, in which
# there are equal values that sum to 1.
# This makes exposure assignment easily
# done through matrix multiplication.
createExpInd <- function(a, b, n) {
  x <- numeric(n)
  x[a:b] <- 1/(b-a + 1)
  return(x)
}

```

```
#####
```

```

# make_exposure_assignment()
#
# Function for making exposure assignment
#
# INPUT:
#   obs -- matrix of exposure observations
#   time.list -- list output from create_timemx()
#
# OUTPUT:
#   expos -- matrix of average exposures
#           for each subject (row) and trimester (column)
#
make_exposure_assignment <- function(obs, time.list){

# Get location name list
locnamelist <- sapply(time.list, function(w) colnames(w$T1))
# Vector of location names, for assigning to rows of output matrix
locnames <- unlist(locnamelist, use.names=FALSE)
# Vector of location counts per grid, to allow for
# efficient index creation, all to avoid (slow!) name
# matching within the loop
indvec <- cumsum(c(1, sapply(locnamelist, length)))
expos <- matrix(data=0, nrow=length(locnames), ncol=3)
rownames(expos) <- locnames
colnames(expos) <- c("T1", "T2", "T3")

  for (i in 1:length(time.list) ){
    grid.i = names(time.list)[i]

    ## Extract 2-week time-series for grid cell i
    exp.i = obs[, colnames(obs) == grid.i]

    # ## Fill in exposure estimates
    T1 <- as.vector(exp.i %>% time.list[[i]]$T1)
    T2 <- as.vector(exp.i %>% time.list[[i]]$T2)
    T3 <- as.vector(exp.i %>% time.list[[i]]$T3)
    inds <- indvec[i]:(indvec[i+1]-1)
    expos[inds, ] <- cbind(T1, T2, T3)
  }
return(expos)
}

```

```
#####
```

```
library(SpatioTemporal)
library(MASS)
```

```
#####
# Load the Data #
#####
```

```
load("GA_PM25_Birthweight.RData")
```

```
# Objects included:
# pm.stmodel -- the STmodel object containing the monitoring data
#               and model specifications
# pm.stdata -- the STdata object containing the monitoring data
# grid.stdata -- an STdata object containing covariate information
#               at grid locations. Used for making predictions.
# est.pm.stmodel -- an estimateSTmodel object containing parameter
#                   estimates for the exposure prediction model
# pm.aqsgrid.stmodel -- an STmodel object for simulating data
#                       at AQS and grid locations simultaneously.
# bwdata -- Synthetic birth weight data. These were generated using
#          random dates, random locations, and random birth weights
#          and thus differ from the observed data used in the
#          manuscript analysis.
```

```
# Note: See the SpatioTemporal package help files for more
# information about structure of the STmodel and STdata objects.
```

```
#####
# Fit original models #
#####
```

```
fitT1 = lm (bwt~T1.exp, data = bwdata)
lmT1coef <- coef(fitT1)
lmT1sigma <- summary(fitT1)$sigma
fitT2 = lm (bwt~T2.exp, data = bwdata)
lmT2coef <- coef(fitT2)
lmT2sigma <- summary(fitT2)$sigma
fitT3 = lm (bwt~T3.exp, data = bwdata)
lmT3coef <- coef(fitT3)
lmT3sigma <- summary(fitT3)$sigma
```

```

#####
#                                     #
# Non-Parametric Bootstrap          #
#                                     #
#####

# Extract spatial covariates
mon.covars <- pm.stdata$covars
# Spatiotemporal covariates
mon.st.covars <- pm.stdata$SpatioTemporal
# Monitor observations matrix
mon.obs <- createDataMatrix(pm.stdata)
# Monitor IDs
mon.list <- colnames(mon.obs)

#####
# NP Bootstrap, Part 1 #
# Monitor Sampling      #
#####

# Code shown here as a loop over B=2 iterations.
# These can also be run in parallel.
B <-2

for (i in 1:B){
  seed <- i
  set.seed(seed)

  mons.i <- sample(mon.list, replace=T)
  mon.obs.i <- mon.obs[, mons.i]
  colnames(mon.obs.i) <- 1:ncol(mon.obs.i) # Give arbitrary monitor IDs
  mon.covars.i <- mon.covars[match(mons.i, mon.covars$ID), ]
  mon.covars.i $x[duplicated(mons.i)] <-
  jitter(mon.covars.i$x[duplicated(mons.i)], amount=0.3) # Jitter by 300m in
  each direction
  mon.covars.i $y[duplicated(mons.i)] <- jitter(mon.covars.i
  $y[duplicated(mons.i)], amount=0.3)
  mon.covars.i $ID <- 1:length(mons.i) # Give arbitrary monitor IDs
  mon.st.covars.i <- mon.st.covars[, mons.i, ]
  dimnames(mon.st.covars.i)[[2]] <- 1:length(mons.i) # Give arbitrary IDs

  pm.stdata.i <- createSTdata(obs= mon.obs.i, covars= mon.covars.i,
  SpatioTemporal = mon.st.covars.i)
  pm.stdata.i$trend <- pm.stmodel$trend # Add the original trend
  pm.stdata.i$trend.fnc <- pm.stmodel$trend.fnc # Add the original trend

# Model Setup
LUR <- list (~ forest_2001 + dist_emiss_2002, ~elevation+forest_2001 +

```



```

local_length + highway_length)
cov.beta <- list(covf = "exp", nugget = F)
cov.nu <- list (covf = "exp", nugget = T)
locations <- list (coords =c("x", "y"), long.lat = c("long", "lat"))
pm.stmodel.i <-createSTmodel(pm.stdata.i, LUR=LUR, ST=c("tmp", "wspd", "rh"),
cov.beta=cov.beta, cov.nu=cov.nu, locations=locations)

# Estimate model parameters
## This may take a long time! ##
x.init<-cbind (c(3, -4, 3, -5, 3, -3, -5), rep (0, 7))
est.pm.stmodel.i <- estimate (pm.stmodel.i, x.init, type="p")

# Make predictions
## This may take a long time! ##
grid.pred.temp.i <- predict(object= pm.stmodel.i , x= est.pm.stmodel.i,
STdata= grid.stdata, pred.var=FALSE, Nmax=2000)
EX.i <- grid.pred.temp.i$EX

# Save the results, if desired
stdatfilename <- paste0("nonparametric_bootstrap_stddata_seed", seed,
".RData")
save(mons.i, EX.i, est.pm.stmodel.i, file=stdatfilename)
}

#####
# NP Bootstrap, Part 2 #
# Health Analysis #
#####

obsdates <- seq(as.Date('2001/1/1'), as.Date('2006/12/11'), by="14 days")
# Create list of time-space linkage information, to facilitate
# simpler computation of trimester exposures
tm <- create_timemx(gridIDs= bwdata$grid, dates= bwdata, obsdates= obsdates)

# Matrix for estimates
coefMX <- matrix(NA, nrow=3, ncol=B, dimnames=list(c("T1", "T2", "T3"), 1:B))

# Loop over simulated exposures
for (i in 1:B){

# Load the ST data for this bootstrap run
stdata.boot.filename <- paste0("nonparametric_bootstrap_stddata_seed", i,
".RData")
load(stdata.boot.filename, verbose=TRUE)

obsPred.i <- exp(EX.i)
expPred <- make_exposure_assignment(obs= obsPred.i, time.list=tm)
bwdata.i <- bwdata

```

```
bwdata.i$T1.exp <- expPred[match(rownames(bwdata), rownames(expPred)), "T1"]
bwdata.i$T2.exp <- expPred[match(rownames(bwdata), rownames(expPred)), "T2"]
bwdata.i$T3.exp <- expPred[match(rownames(bwdata), rownames(expPred)), "T3"]
```

```
subj.i <- sample(nrow(bwdata.i), replace=TRUE)
bwdata.i <- bwdata.i[subj.i, ]
```

```
# Fit Models
fitT1.i = lm ( bwt~T1.exp, data = bwdata.i )
coefs <- c(coef(fitT1.i)[2])
fitT2.i = lm ( bwt~T2.exp, data = bwdata.i )
coefs <- c(coefs, coef(fitT2.i)[2])
fitT3.i = lm ( bwt~T3.exp, data = bwdata.i )
coefs <- c(coefs, coef(fitT3.i)[2])
```

```
coefMX[, i] <- coefs
}
```

```
# Bootstrap corrected estimate for Trimester 1 is:
2* lmT1coef["T1.exp"] - mean(coefMX["T1",,])
```

```
#####
#                               #
#   Parameter Bootstrap         #
#                               #
#####
```

```
#####
# Parameter Boot., Part 1 #
# Exposure Simulation     #
#####
```

```
# Code shown here as a loop over B=2 iterations.
# These can also be run in parallel.
B <- 2
```

```
for (i in 1:B){
  seed <- i
  set.seed(seed)
```

```
# Simulate the data
pm.sim <- simulate(pm.aqsgrid.stmodel, nsim=1, x=coef(est.pm.stmodel)$par,
  nugget.unobs=exp(coef(est.pm.stmodel)$par[length(coef(est.pm.stmodel)$par)]))
# Put into space-time matrix form
obs <- exp(createDataMatrix(obs=pm.sim$obs[[1]]$obs,
  date=pm.sim$obs[[1]]$date, ID=pm.sim$obs[[1]]$ID))
```

```

# Create new STmodel object, with new 'monitor' data
new.pm.stmodel <- pm.stmodel
new.pm.stmodel$obs <- pm.sim$obs[[1]][pm.sim$obs[[1]]$ID %in%
pm.stmodel$locations$ID,]

# Sample new exposure parameters
#
Sigma <- solve(-est.pm.stmodel$res.best$hessian.all)
parest <- mvrnorm(n=1, mu=est.pm.stmodel$res.best$par.all$par, Sigma=Sigma)

# Make predictions
# Note this may take a long time!
grid.pred.temp <- predict(object= new.pm.stmodel , x= parest, STdata=
grid.stdata, pred.var=FALSE, Nmax=2000)
EX <- grid.pred.temp$EX
rm(grid.pred.temp)

# Save the results, if desired
stdatfilename <- paste0("parameter_bootstrap_stddata_seed", seed, ".RData")
save(obs, EX, parest, file=stdatfilename)
}

#####
# Parameter Boot., Part 2 #
# Health Analysis #
#####

# Create list of time-space linkage information, to facilitate
# simpler computation of trimester exposures
obsdates <- seq(as.Date('2001/1/1'), as.Date('2006/12/11'), by="14 days")
tm <- create_timemx(gridIDs= bwdata$grid, dates= bwdata, obsdates= obsdates)

# Matrix for estimates
coefMX <- matrix(NA, nrow=3, ncol=B, dimnames=list(c("T1", "T2", "T3"), 1:B))

# Loop over simulated exposures
for (i in 1:B){
  set.seed(1e5 + i)

  # Load the simulated exposure observations and predictions
  stfilename <- paste0("parameter_bootstrap_stddata_seed", i, ".RData")
  load(stfilename, verbose=TRUE)

  #####
  # Simulate new Health Data, using bootstrapped
  # exposure data at subject locations

  # Make Exposure Assignments

```

```

exp <- make_exposure_assignment(obs=obs, time.list=tm)
lmMMT1.i <- cbind(1, T1.exp=exp[match(rownames(bwdata),rownames(exp)), "T1"])
lmMMT2.i <- cbind(1, T2.exp=exp[match(rownames(bwdata),rownames(exp)), "T2"])
lmMMT3.i <- cbind(1, T3.exp=exp[match(rownames(bwdata),rownames(exp)), "T3"])

# Simulate the health data
T1bwt_mean <- lmMMT1.i %*% lmT1coef
T2bwt_mean <- lmMMT2.i %*% lmT2coef
T3bwt_mean <- lmMMT3.i %*% lmT3coef
eps <- matrix(rnorm(n=3*nrow(bwdata)), nrow=nrow(bwdata), ncol=3)
T1bwt <- T1bwt_mean + lmT1sigma*eps[, 1]
T2bwt <- T2bwt_mean + lmT2sigma*eps[, 2]
T3bwt <- T3bwt_mean + lmT3sigma*eps[, 3]

#####
# Compute predicted exposures, using
# predictions developed from simulated
# monitor data.

# Make Exposure Assignments
obsPred <- exp(EX)
expPred <- make_exposure_assignment(obs=obsPred, time.list=tm)

# Replace model matrices with predictions
lmMMT1.i <- cbind(1, T1.exp= expPred[match(rownames(bwdata),
rownames(expPred)), "T1"])
lmMMT2.i <- cbind(1, T2.exp= expPred[match(rownames(bwdata),
rownames(expPred)), "T2"])
lmMMT3.i <- cbind(1, T3.exp= expPred[match(rownames(bwdata),
rownames(expPred)), "T3"])

fitT1.i <- solve(crossprod(lmMMT1.i), crossprod(lmMMT1.i, T1bwt))
coefs <- c(T1=fitT1.i[2])
rm(fitT1.i, lmMMT1.i); gc()
fitT2.i <- solve(crossprod(lmMMT2.i), crossprod(lmMMT2.i, T2bwt))
coefs <- c(coefs, T2=fitT2.i[2])
rm(fitT2.i, lmMMT2.i); gc()
fitT3.i <- solve(crossprod(lmMMT3.i), crossprod(lmMMT3.i, T3bwt))
coefs <- c(coefs, T3=fitT3.i[2])
rm(fitT3.i, lmMMT3.i); gc()

coefMX[, i] <- coefs
}

# Bootstrap corrected estimate for Trimester 1 is:
2* lmT1coef["T1.exp"] - mean(coefMX["T1",])

```
